# Supplementary material for: Geranylgeranylacetone Ameliorates Skin Inflammation by Regulating and Inducing Thioredoxin via the Thioredoxin Redox System
Source: MDPI journal article supplement (doi:10.3390/antiox12091701), 2023-08-31
Supplement: s1 [file s1]

# **Geranylgeranylacetone Ameliorates Skin Inflammation by Regulating and Inducing Thioredoxin via the Thioredoxin Redox System**

## **Supplementary Material**

Negative results

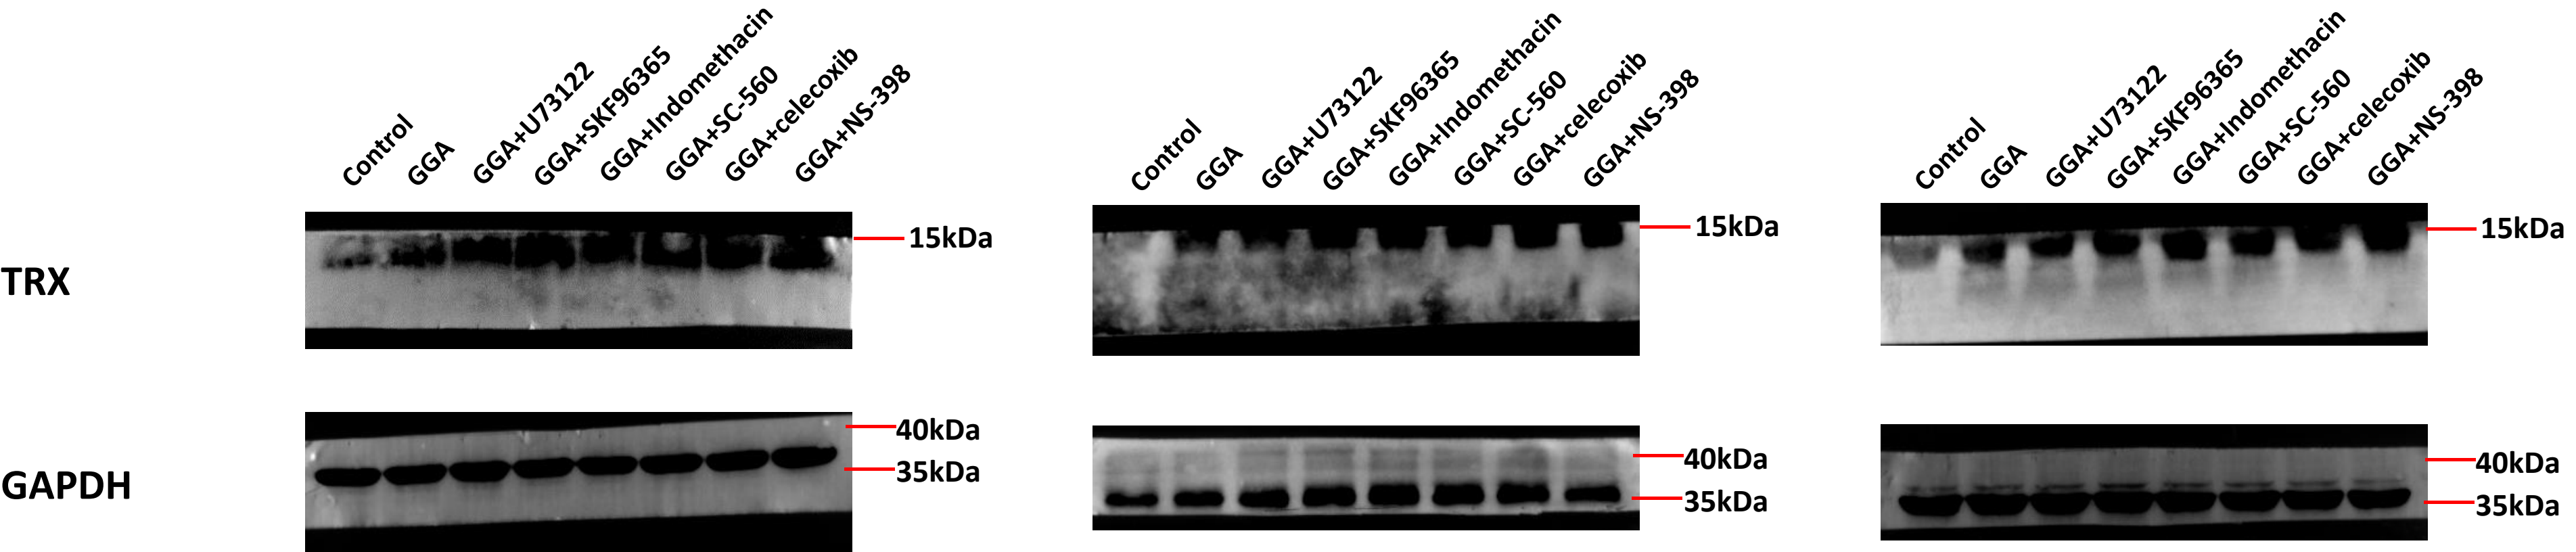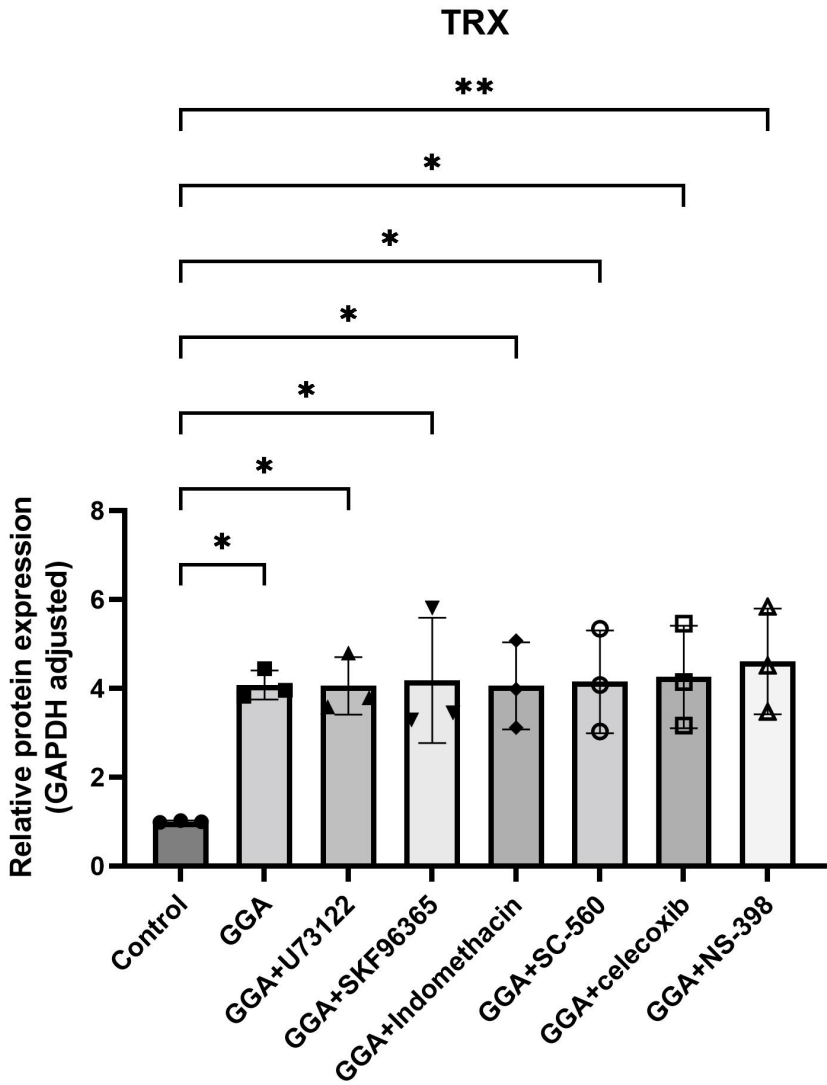

U-73122, SKF96365, Indomethacin, SC-560, celecoxib and NS-398 did not significantly inhibit GGA-induced TRX expression in PAM212 cells. The protein expression of TRX was detected by Western blot at 24 h post-stimulation. The relative expression of TRX was quantified and normalized to GAPDH. Treatments of 10  $\mu$ M U-73122 (phospholipase C inhibitor), 20  $\mu$ M SKF96365 (TRPC inhibitor), 150  $\mu$ M Indomethacin (COX1/2 inhibitor), 0.3  $\mu$ M SC-560 (COX1 inhibitor), 1  $\mu$ M celecoxib (COX2 inhibitor) and 60  $\mu$ M NS-398((COX2 inhibitor)) failed to remarkably inhibit the expression of TRX compared to the GGA-treated group. All inhibitors were purchased from MedChemExpress(China). ; values are mean  $\pm$  SD of three independent experiments (\*p<0.05, \*\*p<0.01; one-way ANOVA with post-hoc Tukey' s).
